# Supplementary material
Source: PubMed Central journal article supplement (PMC2815852)
Supplement: pp.109.146183_1.pdf [file pp.109.146183_1.pdf]

**Table S1: Alleles of SEUSS-LIKE transcriptional co-regulators in Arabidopsis**

| Allele name   | ABRC stock number | Insertion type       | Last AA or noncoding insertion location | nucleotide change - mutant in red insertion site red *                                                                | selection                           |
|---------------|-------------------|----------------------|-----------------------------------------|-----------------------------------------------------------------------------------------------------------------------|-------------------------------------|
| <i>slk1-1</i> | SALK043166        | SALK                 | G242                                    | cac cat gcg ctt ggc a* <u>tg</u> ttc cca cag gca gct                                                                  | Kan sensitive                       |
| <i>slk1-2</i> | SALK093829C       | SALK                 | D387                                    | GTT TCT CAG CAG GAT * <u>TTA</u> CAG TCA<br>AAT AGT AAC<br>ATgtaagttaatgcacattattctttattgtcg*<br>ataactctgacattgtttct | nd                                  |
| <i>slk1-3</i> | CS852593          | WiscDsLox<br>3566.04 | 5'UTR                                   | TGCACAAATCCCAAAA*atcagaatttgaagaaac<br>t                                                                              | basta resistant                     |
| <i>slk2-1</i> | SALK089954        | SALK                 | M278                                    | caa caa gga atg caa atg c* <u>aa</u> cta acc ggt ggg                                                                  | nd                                  |
| <i>slk2-2</i> | SALK038662        | SALK                 | L455<br>5th exon                        | GT CGA CAT GAA GAA CTA CTT * <u>CC</u> *T<br>CGT CGC CTA GTA GCT CCA CAG                                              | nd                                  |
| <i>slk3-1</i> | SALK 090714       | SALK                 | intron 8                                | gag acc caa a* <u>ac</u> gag gtt gc                                                                                   | Kan resistant                       |
| <i>slk3-2</i> | SALK 117317       | SALK                 | intron 4                                | ttt ctt ttg c* <u>cc</u> tgc cta tt*t acc gaa aat                                                                     | Kan partial<br>(weak)<br>resistance |

Our qRT PCR analysis indicated that the *slk2-1* allele was a near null mutant, expressing only 0.4% of the wild type level of *SLK2* mRNA. The *slk1-1* allele is a strong loss-of-function allele that expresses *SLK1* mRNA at 30% of wild type levels and is predicted to encode a truncated protein product containing 242 of 748 amino acids.

**Table S2: Oligos used in this study**

**Genotyping oligos**

| <b>Allele or oligo name</b> | <b>Type</b> | <b>oligo fwd</b>             | <b>oligo rev</b>       |
|-----------------------------|-------------|------------------------------|------------------------|
| <i>slk1-1</i>               | SALK        | TTGGCGTCTGTGCTCGGAAA         | GTCTGGCAAGCACATCAAAC   |
| <i>slk1-2</i>               | SALK        | AAC TGGCCCATTTATAGCTCC       | TGAAGAGCTTCTTCTTCGCAG  |
| <i>slk1-3</i>               | WiscDsLox   | CGCTGGATCAACTGCTGTAA         | TGACCGGTACAGTCGGTTATTA |
| <i>slk2-1</i>               | SALK        | GGTGGACCTACTGGTGGCTA         | ATCAGCAATGACACGACTGG   |
| <i>slk2-2</i>               | SALK        | GCACTTGGTGTTCCTCCTCAG        | GAGCAAAGACTTGGCATCAG   |
| <i>slk3-2</i>               | SALK        | TGCTCTGTGTGTTTTGGTCTG        | TACTTCCCAAACCATTC      |
| <i>slk3-1</i>               | SALK        | CTGCTGCTCCTGAGTGTACC         | TTTGGTGGATGCCAACTATTC  |
| Wisc LB p745                | WiscDsLox   | AACGTCCGCAATGTGTTATTAAGTTGTC |                        |
| LBB1                        | SALK        | GCGTGGACCGCTTGCTGCAACT       |                        |

**qRT-PCR oligos**

| <b>Name of oligos</b> | <b>Gene</b>  | <b>oligo fwd</b>         | <b>oligo rev</b>          |
|-----------------------|--------------|--------------------------|---------------------------|
| RTAPT3/4              | <i>APT</i>   | GTTGCAGGTGTTGAAGCTAGAGGT | TGGCACC AATAGCCAACGCAATAG |
| qETT5658f/5634r       | <i>ETT</i>   | CGAAGACACCACAGACACAGA    | GAGGAAGACGAAACGCAAAC      |
| MPqF2/R2              | <i>MP</i>    | CGAATGCATGTTTGGATTGGAAGG | ACGCATCCCACAACTCTTCCC     |
| RTIAA1-F/R            | <i>IAA1</i>  | AAAGATGGAGATTGGATGTTGG   | CAGTAGGAGCTTCGGATCCTT     |
| RTIAA17-F/R           | <i>IAA17</i> | CCTAAAGATCCAGCCAAACC     | TTGATTTTTGGCAGGAAACC      |
| RTPHB1/2              | <i>PHB</i>   | TCATGCAACAGGGCTATGCT     | AGAACTTTCCACACCGTTGC      |
| RTREV1/2              | <i>REV</i>   | CGCCAAGCTAATGCAACAGGGATT | TGTCTTCCCATCGTTGACACACAG  |
| RTSTM/1               | <i>STM</i>   | TCTCCGGTTATGGAGAGACAGCAA | TCGACTTCTTCCCTCGGATGACCCA |
| RTYUC4-1/2            | <i>YUC4</i>  | GGACAAATTAAGTGACGCAAG    | GGACAAATTAAGTGACGCAAG     |

**Table S3) qRT PCR quantification in inflorescence meristem through stage 6 flowers.**

early arising flowers - flowers 1-15 from apical meristem

| INF to stage 6 flowers |                  |                   |                   |                                   | Stat. Sig. Y/N (p value) |
|------------------------|------------------|-------------------|-------------------|-----------------------------------|--------------------------|
|                        | <i>col-0</i>     | <i>slk1</i>       | <i>seu</i>        | <i>seu slk1</i>                   |                          |
| <i>YUC4</i>            | 0.06<br>+/- 0.01 | 0.07<br>+/- 0.007 | 0.04<br>+/- 0.003 | 0.03<br>+/- 9.0 x10 <sup>-4</sup> | N<br>(0.1)               |
| <i>MP</i>              | 3.6<br>+/- 0.42  | 3.3<br>+/- 0.37   | 3.1<br>+/- 0.30   | 1.7<br>+/- 0.16                   | Y<br>(0.006)             |
| <i>ETT</i>             | 0.42<br>+/- 0.02 | 0.46<br>+/- 0.07  | 0.47<br>+/- 0.03  | 0.26<br>+/- 0.05                  | Y<br>(0.02)              |
| <i>PHB</i>             | 1.14<br>+/- 0.15 | 1.5<br>+/- 0.18   | 1.1<br>+/- 0.14   | 0.32<br>+/- 0.06                  | Y<br>(0.0005)            |

+/- = Standard error of the mean

**Table S4) qRT PCR quantification in stage 8-10 carpels.**

early arising flowers - flowers 1-15 from apical meristem

| stage 8-10 carpels |                  |                  |                  |                  | Stat. Sig. Y/N (p value) |
|--------------------|------------------|------------------|------------------|------------------|--------------------------|
|                    | <i>col-0</i>     | <i>slk1</i>      | <i>seu</i>       | <i>seu slk1</i>  |                          |
| <i>YUC4</i>        | .07<br>+/- 0.007 | .06<br>+/- 0.007 | .05<br>+/- 0.006 | .04<br>+/- 0.01  | N<br>(0.2)               |
| <i>MP</i>          | 3.9<br>+/- 0.33  | 4.0<br>+/- 0.93  | 3.2<br>+/- 0.34  | 2.8<br>+/- 0.39  | N<br>(0.14)              |
| <i>ETT</i>         | 0.31<br>+/- 0.02 | 0.34<br>+/- 0.01 | 0.25<br>+/- 0.01 | 0.26<br>+/- 0.02 | N<br>(0.5)               |
| <i>PHB</i>         | 1.3<br>+/- 0.26  | 1.4<br>+/- 0.18  | 1.1<br>+/- 0.14  | 0.57<br>+/- 0.03 | Y<br>(0.04)              |

+/- = Standard error of the mean

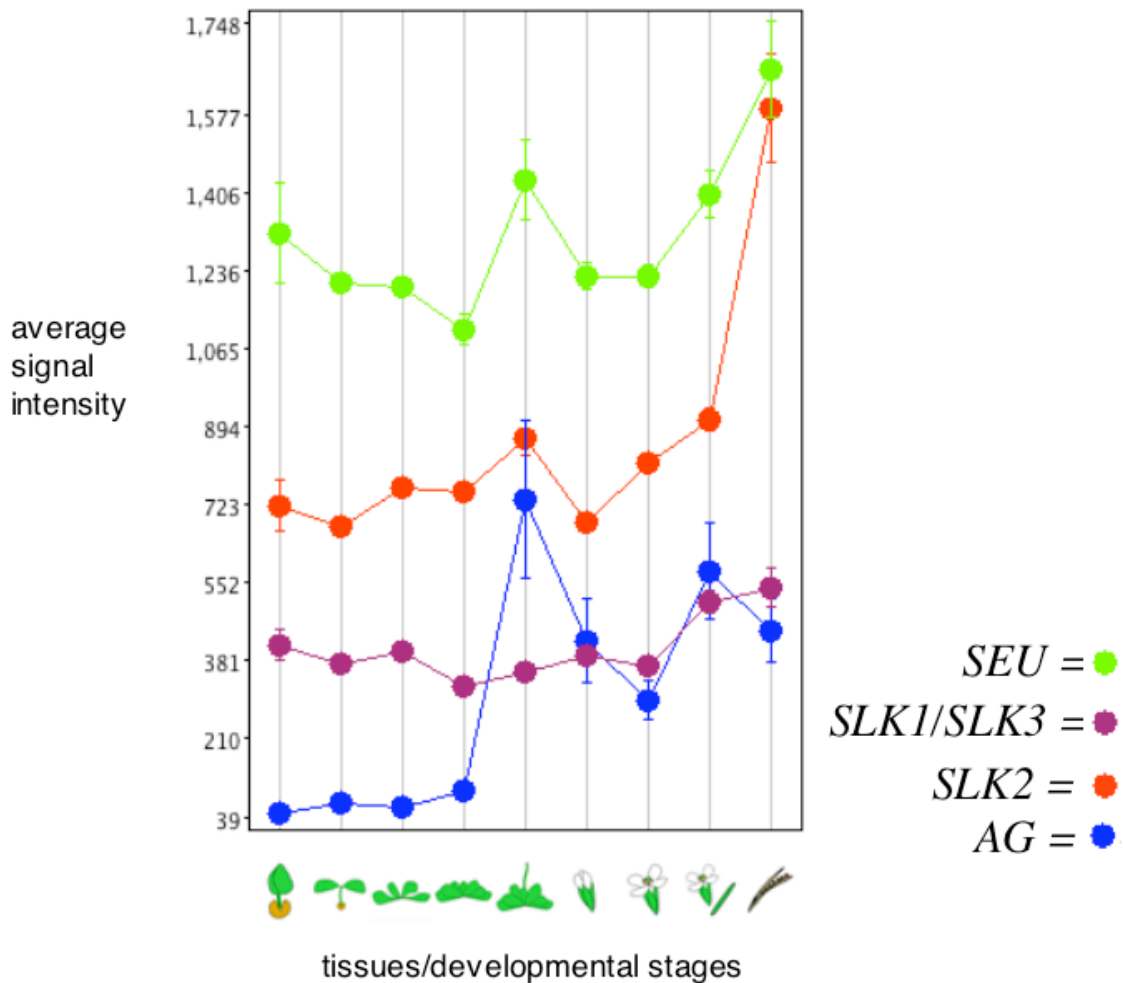

**Figure S1) Genevestigator Expression Data for *SEU* and *SLK* genes**

<https://www.genevestigator.ethz.ch/gv/index.jsp>

Developmental stages are pictured along the x-axis and average signal intensity of the indicated gene along the y-axis. *SLK1* and *SLK3* are shown together as the *SLK3* gene is not represented on the Affymetrix array and the signal reported for the *SLK1* gene may reflect expression of both *SLK1* and *SLK3* due to their high sequence similarity. Expression of *AG* is shown as a comparison and to indicate background (non-specific) level of signal as *AG* is not expected to be expressed in the early vegetative developmental stages.

### SLK gene expression in *slk* mutants

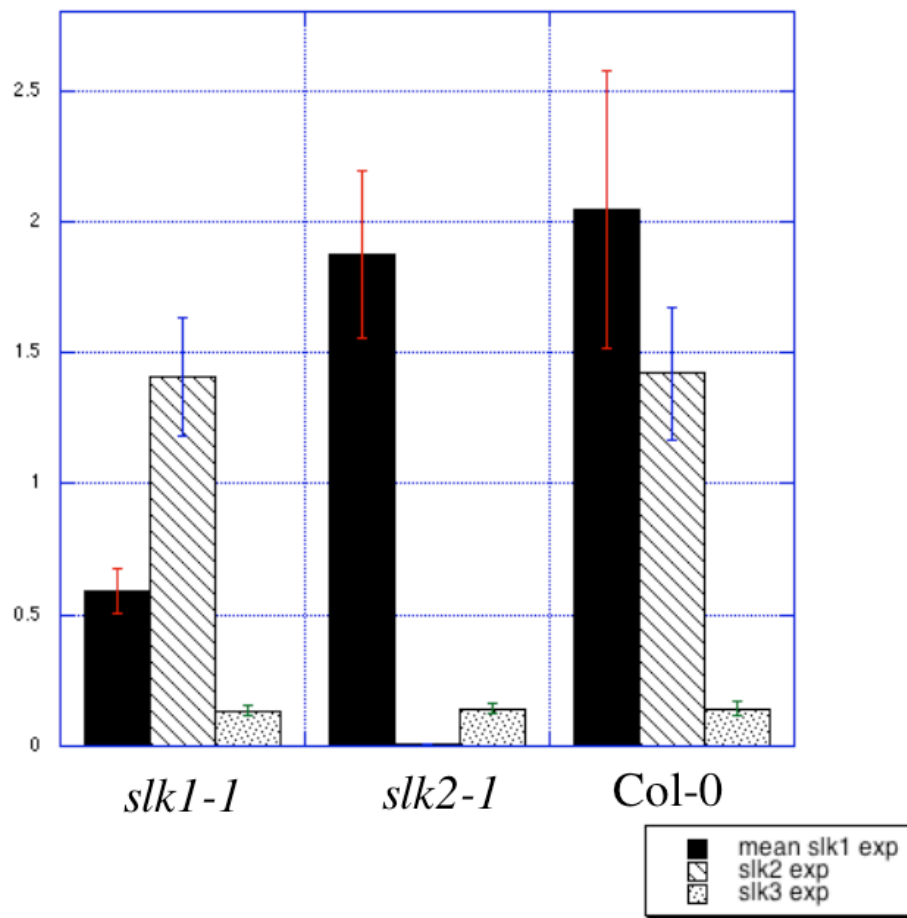

**Figure S2) Quantitative Real-time PCR Expression Data for *SEU* and *SLK* genes**  
Mean expression of indicated *SLK* gene normalized relative to *ADENOSINE PHOSPHORIBOSYL TRANSFERASE (APT)* (At1g27450) as determined by quantitative real-time PCR. RNA prepared from whole inflorescence (inflorescence meristem plus floral stages 1-14). Results are averages and standard error of the mean for four biological replicates each in technical triplicate. Genotype of the tissues used is indicated along the X-axis. Results indicate the *slk2-1* allele is a near RNA null (0.4% of wild type levels of *SLK2* RNA). No significant reduction in the expression levels of relevant transcript were detected in the *slk2-2*, or *slk3-1* alleles (data not shown). Expression of relevant transcript was determined with PCR primers that are anneal to the mRNA at a location three prime from the site of T-DNA insertion (Table S2).

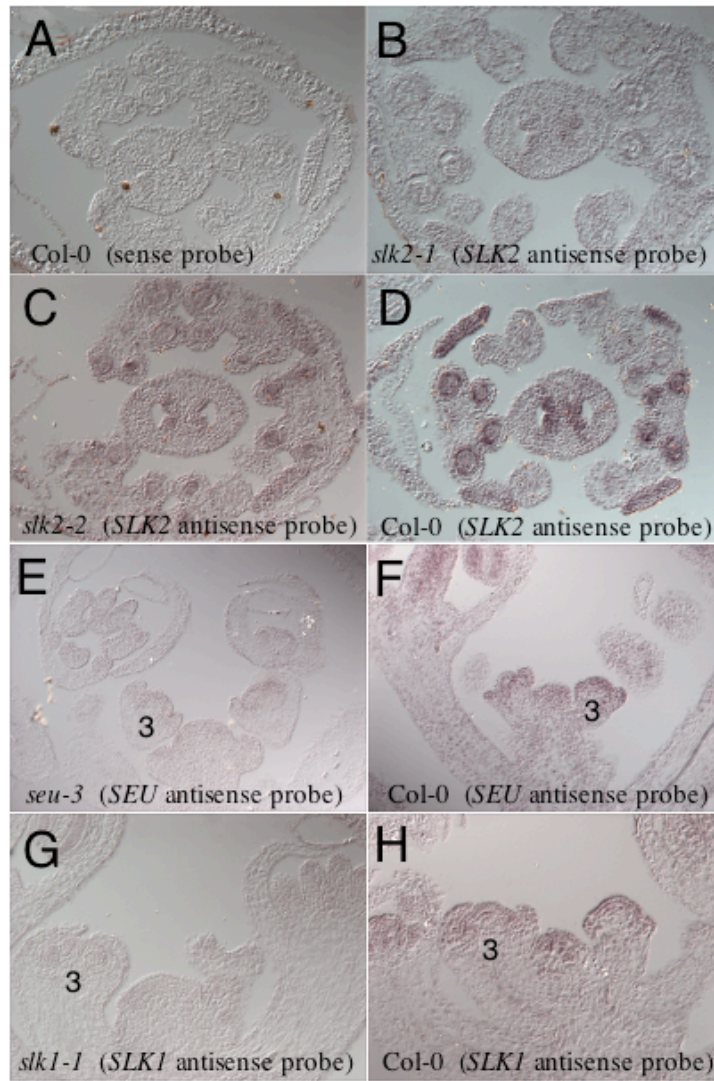

**Figure S3 - Specificity of the *SEU*, *SLK1* and *SLK2* antisense in situ probes**

In situ hybridization on floral sections. Probes and genotypes as indicated in panels. Floral stage 3 indicated (3).

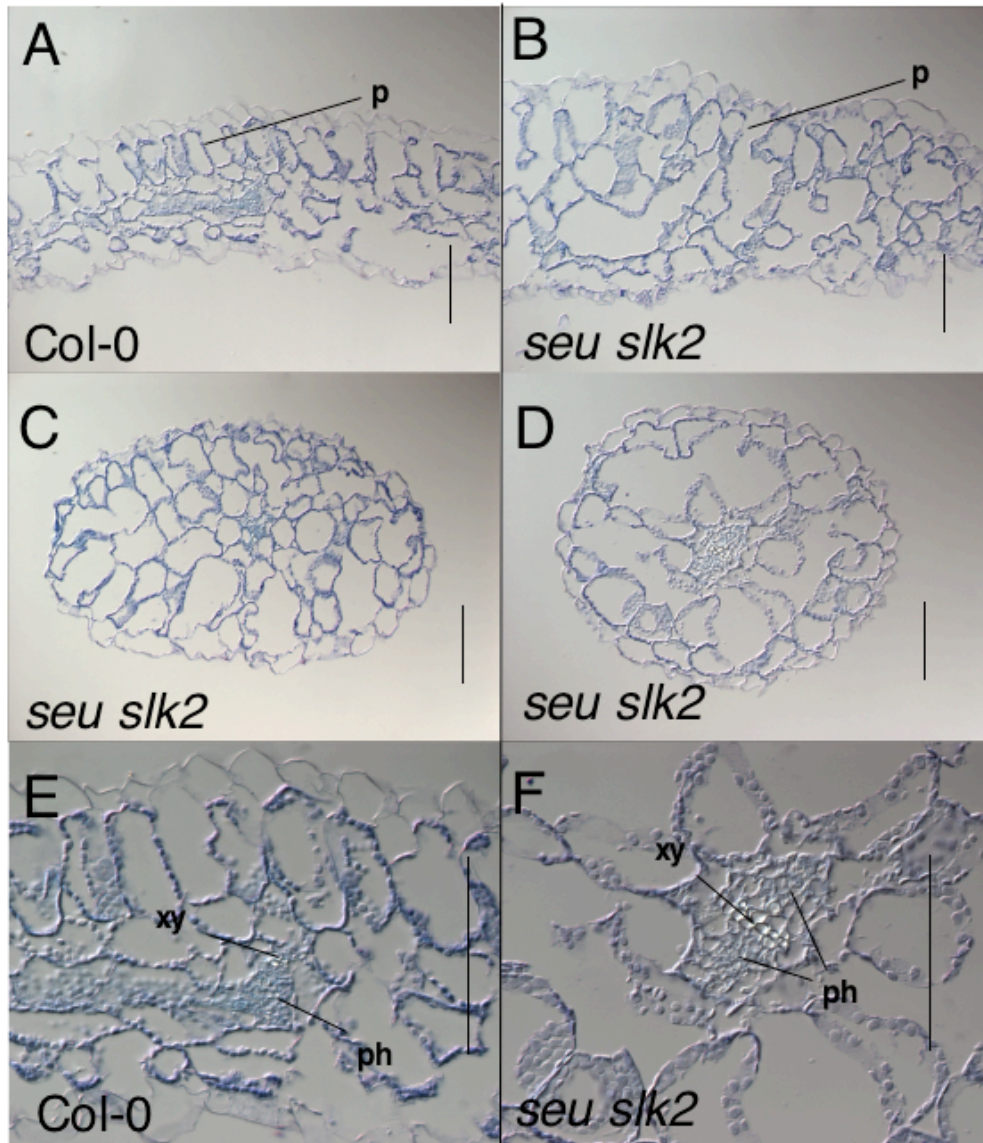

**Figure S4.) Morphological alterations of cotyledon mesophyll cells and vascular elements in the *seu slk2* double mutant**

Toluidine blue-stained cotyledon cross-sections from Col-0 and *seu slk2* double mutant seedlings at seven days post germination. Adaxial surface is orientated upwards in all images. A) Col-0 cotyledon shows closely-packed, cylindrical-shaped palisade mesophyll cells (p) positioned adaxially in the sub-epidermal cell layer. B) In the majority of *seu slk2* mutant cotyledons palisade-like cells were observed adaxially. The *seu slk2* mutant cells were slightly larger than the wild type palisade cells. C and D) In intermediate and severely radialized cotyledons the palisade cell layer could not be easily distinguished. E and F) Higher magnification images of panels A and D, respectively show alterations to arrangement of xylem (xy) and phloem (ph) in the radialized *seu slk2* mutant cotyledons. In this vascular element, phloem cells were observed on both sides of the xylem trace.
